# Supplementary material for: Effect of Wheat Milling Process on the Distribution of Alternaria Toxins
Source: PubMed Central journal article supplement (PMC6468426; doi:10.3390/toxins11030139), 2019-03-01
Supplement: toxins-11-00139-s001.pdf [file toxins-11-00139-s001.pdf]

## Supplementary Materials

**Table S1.** Recovery data of the employed analytical method based on solvent ( $R_A$ ) and matrix-matched ( $R_E$ ) calibration curves and matrix effect (SSE), limit of detection (LOD) and limit of quantification (LOQ).

| Fractions     | Spiking level* ( $\mu\text{g} \times \text{kg}^{-1}$ ) |       |         | Overall method recovery<br>$R_A$ (%) |      |       | Sample preparation recovery $R_E$<br>(%) |       |       | Matrix effect SSE<br>(%) |       |       | LOD/LOQ ( $\mu\text{g} \times \text{kg}^{-1}$ ) |         |         |
|---------------|--------------------------------------------------------|-------|---------|--------------------------------------|------|-------|------------------------------------------|-------|-------|--------------------------|-------|-------|-------------------------------------------------|---------|---------|
|               | AOH                                                    | AME   | TeA     | AOH                                  | AME  | TeA   | AOH                                      | AME   | TeA   | AOH                      | AME   | TeA   | AOH                                             | AME     | TeA     |
| <b>I</b>      | 0.5–10                                                 | 0.1–5 | 5–30    | 97.3                                 | 80.1 | 84.0  | 81.0                                     | 98.9  | 105.6 | 120.0                    | 81.1  | 79.5  | 0.5/1.65                                        | 0.3/1.0 | 2.5/7.5 |
| <b>II</b>     | 0.5–10                                                 | 0.1–5 | 2.5–30  | 87.2                                 | 75.5 | 84.9  | 119.7                                    | 86.2  | 74.5  | 123.3                    | 87.6  | 114   | 0.5/1.65                                        | 0.3/1.0 | 1.5/5.0 |
| <b>III</b>    | 0.5–10                                                 | 0.1–5 | 2.5–50  | 127.7                                | 71.4 | 83.2  | 95.6                                     | 85.4  | 81.3  | 133.6                    | 83.7  | 102.3 | 0.5/1.65                                        | 0.1/0.3 | 1.5/5.0 |
| <b>IV</b>     | 0.5–10                                                 | 0.1–5 | 7.5–100 | 126.9                                | 44.6 | 110.6 | 86.4                                     | 79.8  | 89.6  | 146.8                    | 55.8  | 123.5 | 0.75/2.5                                        | 0.3/1.0 | 2.5/7.5 |
| <b>V</b>      | 0.75–10                                                | 0.1–5 | 2.5–50  | 85.2                                 | 89.0 | 84.4  | 94.5                                     | 97.7  | 90.2  | 90.2                     | 91.2  | 93.6  | 0.75/2.5                                        | 0.1/0.3 | 1.5/5.0 |
| <b>VI</b>     | 0.5–10                                                 | 0.1–5 | 7.5–200 | 80.5                                 | 63.8 | 57.4  | 103.1                                    | 82.6  | 77.8  | 128.1                    | 77.3  | 73.9  | 0.5/1.65                                        | 0.1/0.3 | 1.5/5.0 |
| <b>1</b>      | 0.5–10                                                 | 0.1–5 | 2.5–15  | 77.6                                 | 57.4 | 72.3  | 100                                      | 82.0  | 87.2  | 77.6                     | 70.0  | 82.9  | 0.75/2.5                                        | 0.1/0.3 | 1.5/5.0 |
| <b>2</b>      | 0.5–5                                                  | 0.5–5 | 2.5–10  | 76.9                                 | 93.0 | 81.8  | 94.4                                     | 109.9 | 74.6  | 81.4                     | 118.2 | 109.7 | 0.5/1.65                                        | 0.3/1.0 | 1.5/5.0 |
| <b>3</b>      | 0.5–10                                                 | 0.1–5 | 2.5–15  | 99.4                                 | 77.5 | 101.3 | 96.4                                     | 81.1  | 91.5  | 103.1                    | 95.5  | 110.8 | 0.5/1.65                                        | 0.1/0.3 | 1.5/5.0 |
| <b>4</b>      | 0.5–10                                                 | 0.1–5 | 7.5–50  | 84.0                                 | 57.6 | 74.9  | 102.1                                    | 75.0  | 109.8 | 82.2                     | 76.6  | 68.2  | 0.75/2.5                                        | 0.3/1.0 | 1.5/5.0 |
| <b>5</b>      | 0.75–10                                                | 0.1–5 | 7.5–100 | 91.4                                 | 94.1 | 98.9  | 72.8                                     | 72.9  | 89.9  | 122.3                    | 129.2 | 110.1 | 0.3/1.0                                         | 0.1/0.3 | 1.5/5.0 |
| <b>6</b>      | 0.5–10                                                 | 0.1–5 | 7.5–200 | 76.3                                 | 73.3 | 63.7  | 85.3                                     | 92.3  | 91.2  | 89.4                     | 79.4  | 69.8  | 0.5/1.65                                        | 0.1/0.3 | 1.5/5.0 |
| <b>Bran</b>   | 0.75–10                                                | 0.1–5 | 7.5–200 | 83.1                                 | 67.5 | 83.8  | 78.8                                     | 102.7 | 90.5  | 105.6                    | 65.7  | 92.6  | 0.75/2.5                                        | 0.3/1.0 | 1.5/5.0 |
| <b>Shorts</b> | 0.75–10                                                | 0.1–5 | 7.5–200 | 55.1                                 | 63.2 | 71.2  | 70.2                                     | 85.3  | 81.9  | 78.4                     | 74.1  | 86.9  | 0.5/1.65                                        | 0.3/1.0 | 1.5/5.0 |

AOH: alternariol; AME: alternariol monomethyl ether; TeA: tenuazonic acid.

**Table S2.** Repeatability of alternariol (AOH), alternariol monomethyl ether (AME) and tenuazonic acid (TeA).

| Fractions | Repeatability ( <i>n</i> = 6) RSD (%)                 |      |                                                       |      |                                                       |      |
|-----------|-------------------------------------------------------|------|-------------------------------------------------------|------|-------------------------------------------------------|------|
|           | Spiking level ( $\mu\text{g} \times \text{kg}^{-1}$ ) | AOH  | Spiking level ( $\mu\text{g} \times \text{kg}^{-1}$ ) | AME  | Spiking level ( $\mu\text{g} \times \text{kg}^{-1}$ ) | TeA  |
| I         | 0.75                                                  | 11.8 | 0.3                                                   | 14.3 | 5                                                     | 16.9 |
|           | 2.5                                                   | 9.5  | 0.75                                                  | 13.2 | 10                                                    | 11.3 |
|           | 5                                                     | 8.3  | 2.5                                                   | 12.2 | 15                                                    | 6.3  |
| II        | 0.75                                                  | 10.4 | 0.1                                                   | 19.4 | 5                                                     | 13.7 |
|           | 2.5                                                   | 9.0  | 0.3                                                   | 15.0 | 15                                                    | 10.8 |
|           | 5                                                     | 7.2  | 0.75                                                  | 13.6 | 30                                                    | 5.3  |
| III       | 0.75                                                  | 13.5 | 0.1                                                   | 14.9 | 7.5                                                   | 12.3 |
|           | 2.5                                                   | 9.3  | 0.3                                                   | 13.1 | 15                                                    | 10.5 |
|           | 5                                                     | 5.8  | 0.75                                                  | 12.4 | 30                                                    | 8.2  |
| IV        | 2.5                                                   | 18.1 | 0.3                                                   | 14.1 | 10                                                    | 7.5  |
|           | 5                                                     | 13.6 | 0.75                                                  | 9.8  | 50                                                    | 3.7  |
|           | 7.5                                                   | 8.2  | 2.5                                                   | 8.8  | 100                                                   | 3.3  |
| V         | 0.75                                                  | 17.9 | 0.3                                                   | 18.0 | 10                                                    | 18.3 |
|           | 2.5                                                   | 13.9 | 0.75                                                  | 15.9 | 30                                                    | 15.3 |
|           | 5                                                     | 11.7 | 2.5                                                   | 9.3  | 50                                                    | 11.0 |
| VI        | 0.75                                                  | 14.0 | 0.1                                                   | 12.4 | 30                                                    | 4.8  |
|           | 2.5                                                   | 13.4 | 0.75                                                  | 5.8  | 100                                                   | 4.1  |
|           | 7.5                                                   | 9.0  | 2.5                                                   | 4.2  | 200                                                   | 3.5  |
| 1         | 0.75                                                  | 11.8 | 0.1                                                   | 17.3 | 2.5                                                   | 12.2 |
|           | 2.5                                                   | 10.4 | 0.3                                                   | 12.3 | 5                                                     | 10.3 |
|           | 5                                                     | 6.0  | 0.75                                                  | 11.4 | 10                                                    | 7.5  |
| 2         | 0.5                                                   | 17.9 | 0.5                                                   | 12.8 | 2.5                                                   | 16.8 |
|           | 2.5                                                   | 13.1 | 2.5                                                   | 10.8 | 7.5                                                   | 15.3 |
|           | 5                                                     | 6.9  | 5                                                     | 8.8  | 10                                                    | 14.9 |
| 3         | 0.75                                                  | 17.6 | 0.1                                                   | 18.2 | 5                                                     | 7.1  |
|           | 2.5                                                   | 17.1 | 0.3                                                   | 12.1 | 10                                                    | 6.6  |
|           | 5                                                     | 11.5 | 0.75                                                  | 11.0 | 15                                                    | 5.9  |
| 4         | 0.75                                                  | 15.4 | 0.3                                                   | 16.9 | 2.5                                                   | 9.4  |
|           | 2.5                                                   | 10.7 | 0.75                                                  | 14.7 | 5                                                     | 8.7  |
|           | 5                                                     | 5.8  | 2.5                                                   | 10.5 | 15                                                    | 5.5  |
| 5         | 0.75                                                  | 17.3 | 0.3                                                   | 13.8 | 30                                                    | 13.9 |
|           | 2.5                                                   | 11.0 | 0.75                                                  | 12.7 | 50                                                    | 9.7  |
|           | 5                                                     | 9.1  | 2.5                                                   | 11.4 | 100                                                   | 9.3  |
| 6         | 0.75                                                  | 18.3 | 0.1                                                   | 12.0 | 50                                                    | 8.5  |

|               |     |      |      |      |     |      |
|---------------|-----|------|------|------|-----|------|
|               | 2.5 | 15.6 | 0.75 | 9.6  | 100 | 1.2  |
|               | 5   | 11.6 | 2.5  | 3.6  | 200 | 1.0  |
|               | 2.5 | 15.4 | 0.3  | 18.9 | 50  | 17.1 |
| <b>Bran</b>   | 5   | 10.2 | 0.75 | 15.4 | 100 | 14.8 |
|               | 10  | 8.2  | 2.5  | 12.1 | 200 | 5.7  |
|               | 2.5 | 16.1 | 0.75 | 16.5 | 50  | 11.4 |
| <b>Shorts</b> | 5   | 12.7 | 2.5  | 12.7 | 100 | 11.1 |
|               | 10  | 9.8  | 5    | 12.5 | 200 | 8.3  |
